# Supplementary material for: Reconstructing Late Holocene North Atlantic atmospheric circulation changes using functional paleoclimate networks
Source: Copernicus journal article supplement (doi:10.5194/cp-2017-41), 2017-03-14
Supplement: Supplementary file 1 [file cp-2017-41-supplement.zip]

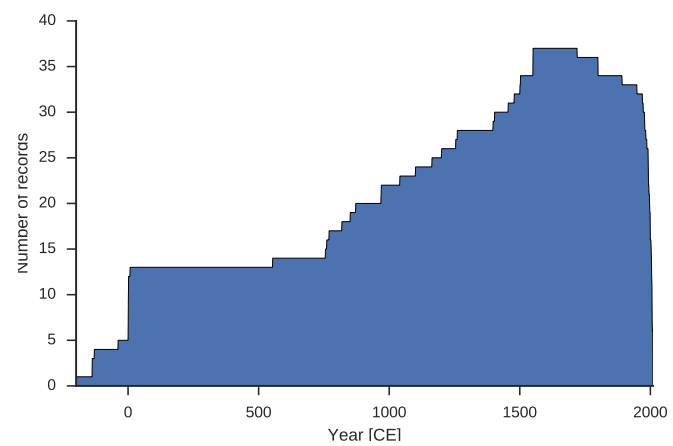

**Figure S1.** Number of records covering a given year.

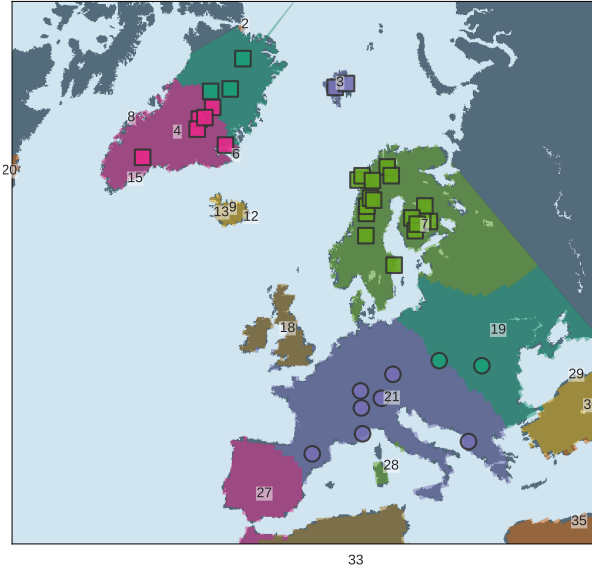

(a) JJA temperature,  $\alpha_C = 0.008$

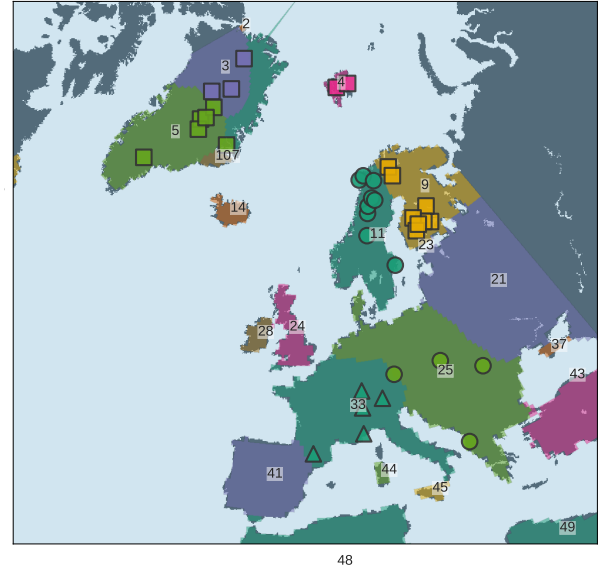

(b) DJF temperature,  $\alpha_C = 0.007$

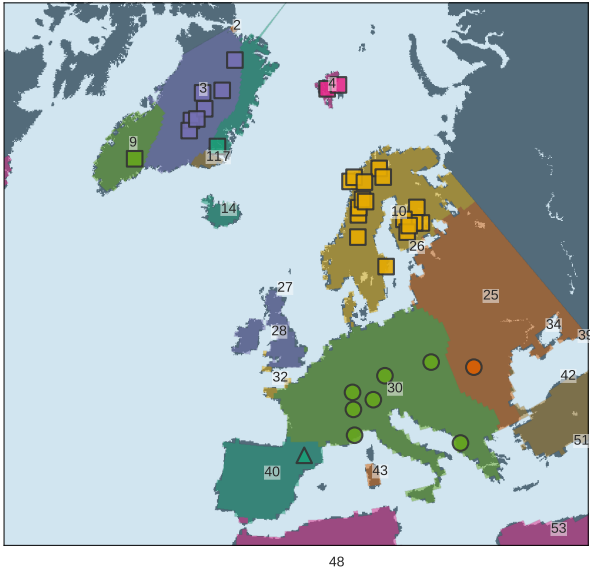

(c) all seasonal temperatures,  $\alpha_C = 0.0115$

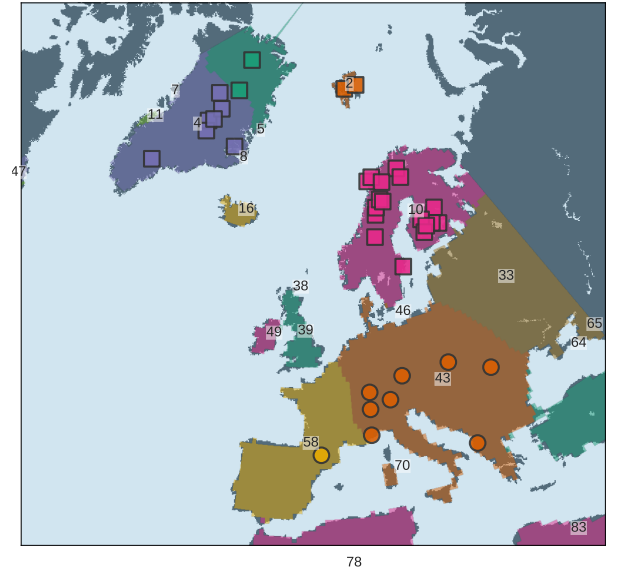

(d) annual temperature,  $\alpha_C = 0.008$

**Figure S2.** Obtained geographical clusters based on different temperature-related variables obtained from the ERA-20C reanalysis.

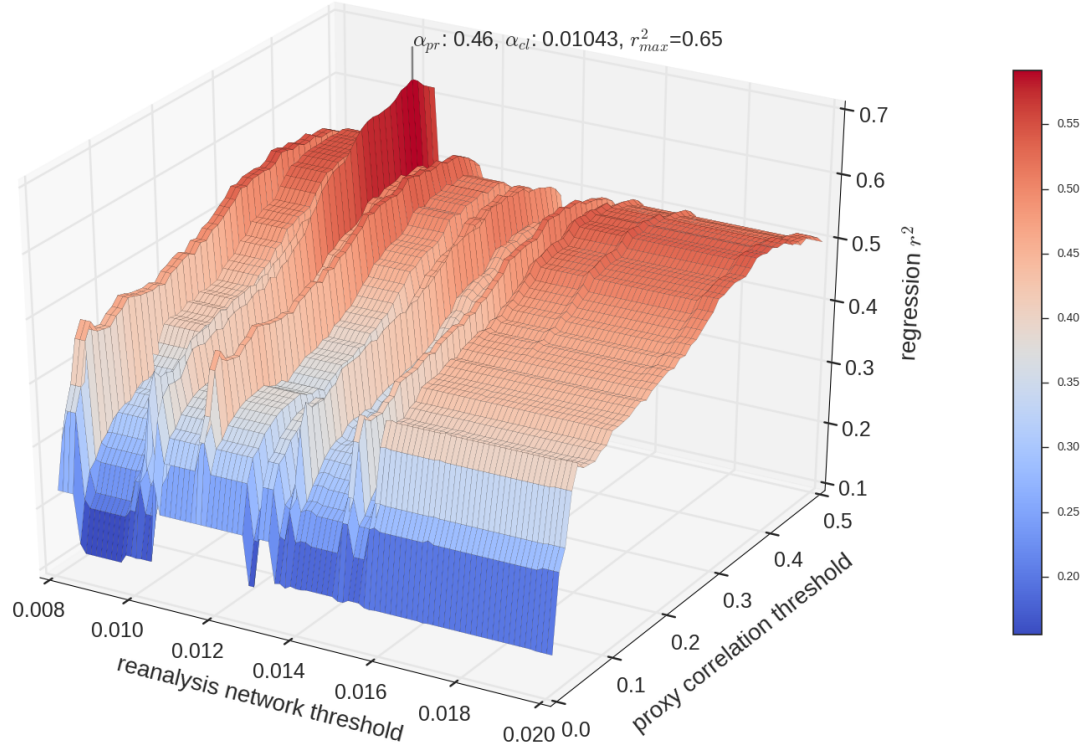

**Figure S3.**  $r^2$  values of the OLS regression models obtained for different parameter combinations of  $\alpha_{pr}$  and  $\alpha_C$ . The resulting clusters of each parameter setting (determined by  $\alpha_C$ ) have been used to fit a linear model (see main text for details) based upon the cross-link densities to the 50 year-averaged NAO reconstruction by Ortega et al. (2015). The parameter values used within the main paper are those that maximize  $r^2$ .

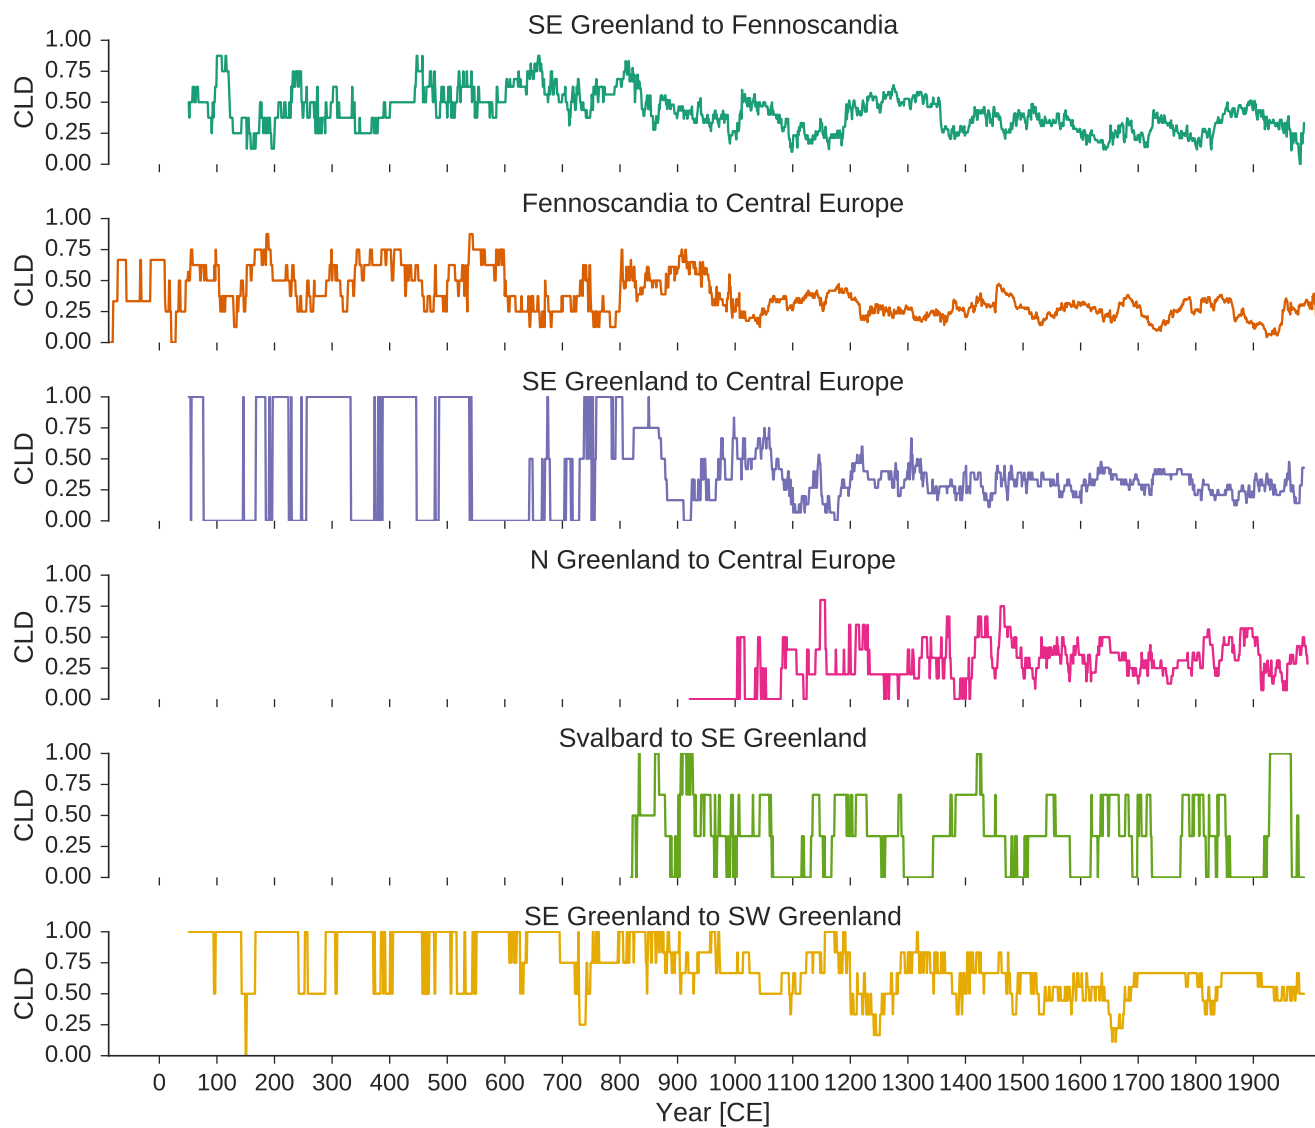

**Figure S4.** Evolution of the six cross-link densities with the largest regression coefficients of our linear model (see Tab. S2).

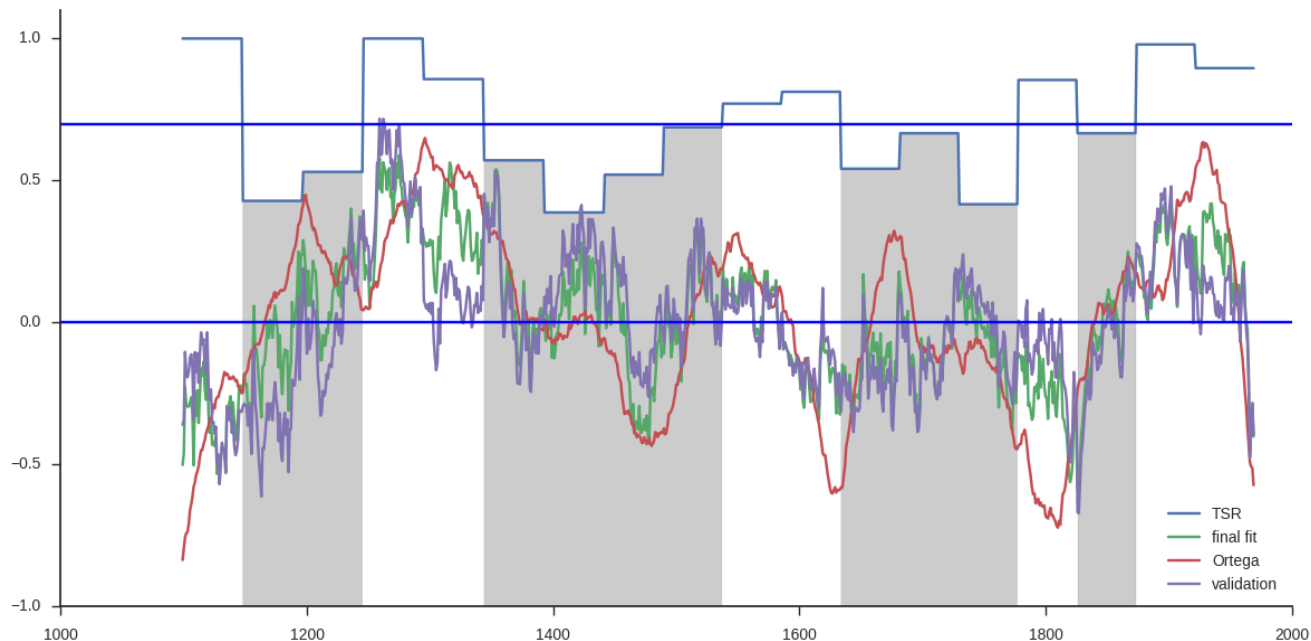

**Figure S5.** Testing the regression quality by using (mutually exclusive) 50-year time windows as validation data and the rest as training data for our regression model. The red line corresponds to the regression target, the 50-year running average of the NAO reconstruction by Ortega et al. (2015). The purple line indicates the values predicted by our model for each individual time window, the green line denotes the median of the final regression model, and the blue line shows the true sign ratio (TSR) for each window. The horizontal line marks the mean value of TSR (0.69); periods with lower values are shaded in gray.

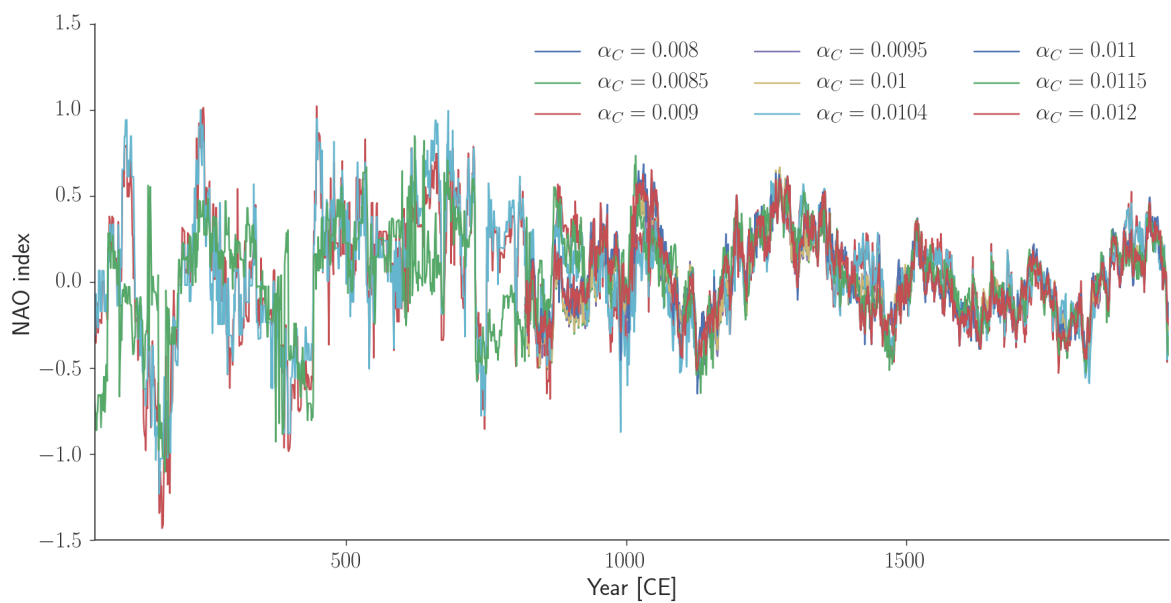

**Figure S6.** Qualitative NAO reconstructions obtained with different parameters of  $\alpha_C$ .

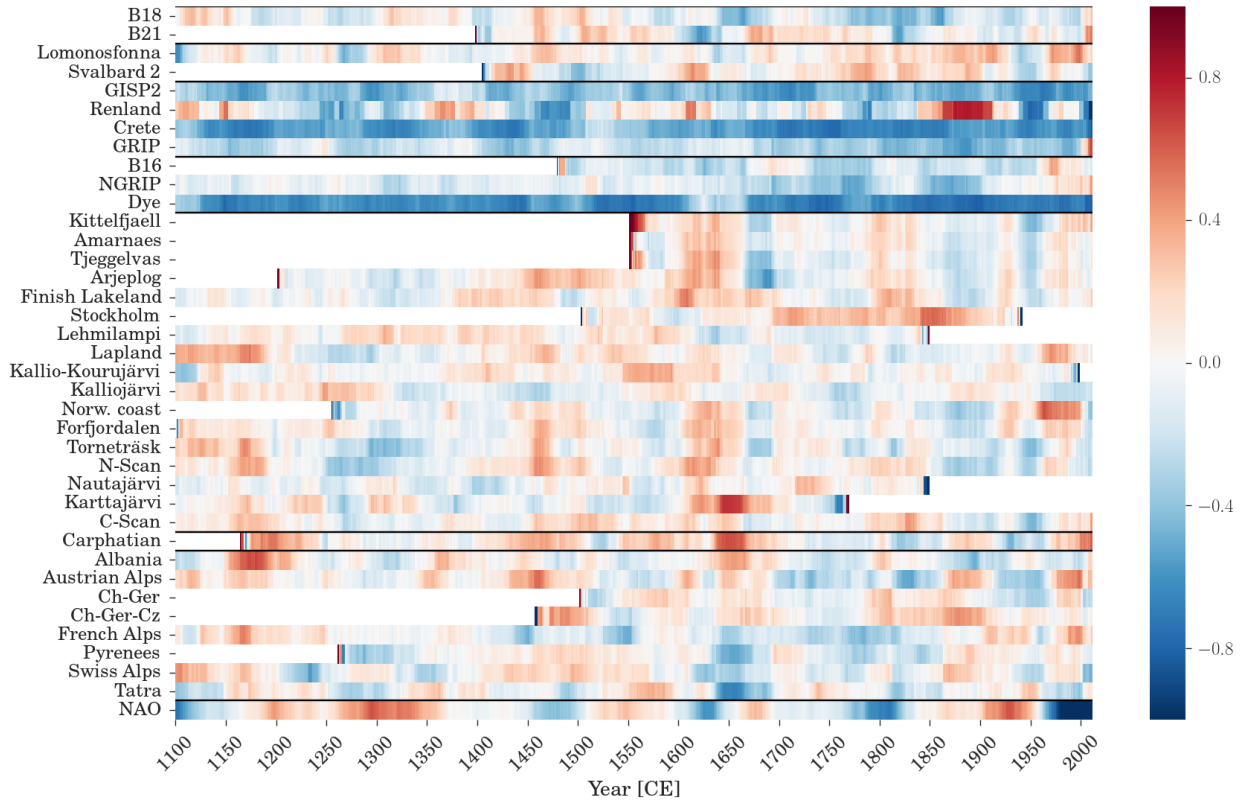

**Figure S7.** Correlations between the different records used in our study and the NAO reconstruction by Ortega et al. (2015) for 50-year running windows. Spatial clusters as discussed in the main paper are separated by black lines.

**Table S1.** The data used in this analysis.

| name              | long. [°W] | lat. [°N] | archive | proxy                 | variable                  | first [CE] | last [CE] | res. | reference                  |
|-------------------|------------|-----------|---------|-----------------------|---------------------------|------------|-----------|------|----------------------------|
| Albania           | 41         | 20        | TR      | TRW                   | TRW index [-]             | 968        | 2008      | 1    | Seim et al. (2012)         |
| Austria           | 47         | 10.7      | TR      | TRW                   | T [°C]                    | 1          | 2003      | ~1   | Büntgen et al. (2011)      |
| Ch-Ger-Cz         | 49         | 13        | hist.   |                       | T [°C]                    | 1500       | 2007      | 1    | Dobrovolný et al. (2010)   |
| Carpathian        | 47         | 25.3      | TR      | TRW                   | T [°C]                    | 1163       | 2005      | 1    | Popa and Kern (2009)       |
| French Alps       | 44         | 7.5       | TR      | TRW                   | TRW index [-]             | 969        | 2007      | 1    | Büntgen et al. (2012)      |
| Pyrenees          | 42.5       | 1         | TR      | MXD/TRW               | T [°C]                    | 1260       | 2005      | 1    | Dorado Liñán et al. (2012) |
| NScan             | 68         | 25        | TR      | MXD                   | T [°C]                    | 1          | 2006      | 1    | Esper et al. (2012)        |
| Swiss Alps        | 46.4       | 7.8       | TR      | MXD                   | T [°C]                    | 755        | 1892      | ~1   | Büntgen et al. (2006)      |
| Stockholm         | 59.32      | 18.06     | hist.   |                       | T [°C]                    | 1502       | 1892      | 1    | Leijonhufvud et al. (2010) |
| Korttajärvi       | 62.33      | 25.68     | LS      | XRD                   | XRD                       | 0          | 1720      | 1    | Tiljander et al. (2003)    |
| Kittelfjæl        | 65.2       | 15.5      | TR      | MXD                   | RSF <sub>i</sub>          | 1550       | 2007      | 1    | Björklund et al. (2013)    |
| Amarnaes          | 65.9       | 16.1      | TR      | MXD                   | RSF <sub>i</sub>          | 1550       | 2010      | 1    | Björklund et al. (2013)    |
| Tjeggelvas        | 66.6       | 17.6      | TR      | BI                    | BRSF <sub>i</sub>         |            |           | 1    | Björklund et al. (2013)    |
| Arjeplog          | 66.3       | 18.2      | TR      | BI                    | BRSF <sub>i</sub>         | 1200       | 2010      | 1    | Björklund et al. (2013)    |
| Lomonosfonna      | 78.87      | 17.425    | IC      | $\delta^{18}\text{O}$ | $\delta^{18}\text{O}$ [‰] | 769        | 1997      | 1    | Divine et al. (2011)       |
| Ch-Ger            | 48         | 8         | hist.   |                       | T [°C]                    | 1454       | 1970      | 1    | Wetter and Pfister (2011)  |
| GISP2             | 72.1       | -38.8     | IC      | $\delta^{18}\text{O}$ | $\delta^{18}\text{O}$ [‰] | 818        | 1987      | 1    | Grootes and Stuiver (1997) |
| Lehmilampi        | 63.62      | 29.1      | LS      | VT                    | VT [mm]                   | 1          | 1800      | 1    | Haltia-Hovi et al. (2007)  |
| Lapland           | 69         | 25        | TR      | TRW                   | T [°C]                    | 0          | 2000      | 1    | Helama et al. (2009)       |
| Svalbard 2        | 79.83      | 24.02     | IC      | $\delta^{18}\text{O}$ | $\delta^{18}\text{O}$ [‰] | 1400       | 1998      | ~1   | Isaksson et al. (2005)     |
| Kallio-Kourujärvi | 62.33      | 27.04     | LS      | VT                    | VT [mm]                   | -129       | 149       | 1    | Saarni et al. (2015)       |
| Kalliojärvi       | 63.13      | 25.22     | LS      | VT                    | VT [mm]                   | -137       | 2000      | 1    | Saarni et al. (2016)       |
| Norw. coast       | 68.78      | 15.75     | TR      | TRW                   | TRW index                 | 1254       | 1993      | 1    | Kirchhefer (2001)          |
| Forfjordalen      | 69.08      | 17.22     | TR      | TRW/MXD               | trsgi                     | 1100       | 2007      | 1    | McCarroll et al. (2013)    |
| Torneträsk        | 68.26      | 19.6      | TR      | TRW/MXD               | T [°C]                    | -39        | 2010      | 1    | Melvin et al. (2013)       |
| Nautajärvi        | 61.81      | 24.68     | LS      | OM                    | OMA                       | 0          | 1800      | 1    | Ojala and Alenius (2005)   |
| B16               | 73.94      | -37.63    | IC      | $\delta^{18}\text{O}$ | $\delta^{18}\text{O}$ [‰] | 1478       | 1992      | 1    | Fischer et al. (1998)      |
| B18               | 76.62      | -36.4     | IC      | $\delta^{18}\text{O}$ | $\delta^{18}\text{O}$ [‰] | 871        | 1992      | 1    | Fischer et al. (1998)      |
| B21               | 80         | -41.14    | IC      | $\delta^{18}\text{O}$ | $\delta^{18}\text{O}$ [‰] | 1397       | 1992      | 1    | Fischer et al. (1998)      |
| Tatra             | 49         | 20        | TR      | TRW                   | T [°C]                    | 1040       | 2011      | 1    | Büntgen et al. (2013)      |
| NGRIP             | 75.1       | -42.32    | IC      | $\delta^{18}\text{O}$ | $\delta^{18}\text{O}$ [‰] | 0          | 1995      | 1    | Vinther et al. (2006)      |
| Renland           | 71.27      | -26.73    | IC      | $\delta^{18}\text{O}$ | $\delta^{18}\text{O}$ [‰] | 3          | 1993      | 5    | Vinther et al. (2008)      |
| Crete             | 71.12      | -37.32    | IC      | $\delta^{18}\text{O}$ | $\delta^{18}\text{O}$ [‰] | 553        | 1973      | 1    | Vinther et al. (2010)      |
| Dye               | 65.18      | -43.83    | IC      | $\delta^{18}\text{O}$ | $\delta^{18}\text{O}$ [‰] | 1          | 1978      | 1    | Vinther et al. (2010)      |
| GRIP              | 72.58      | -37.64    | IC      | $\delta^{18}\text{O}$ | $\delta^{18}\text{O}$ [‰] | 850        | 2011      | 1    | Vinther et al. (2010)      |
| CScan             | 63         | 14.05     | TR      | MXD                   | T [°C]                    | 850        | 2011      | 1    | Zhang et al. (2016)        |



**Table S2.** Mean values and standard deviations of the MCMC regression coefficients corresponding to the individual cross-link densities used in this study.

| connection                     | mean value | standard deviation |
|--------------------------------|------------|--------------------|
| SE Greenland to Fennoscandia   | 1.9        | 0.09               |
| Fennoscandia to Central Europe | - 0.73     | 0.1                |
| SE Greenland to Central Europe | -0.59      | 0.09               |
| N Greenland to Central Europe  | -0.26      | 0.05               |
| Svalbard to SE Greenland       | 0.23       | 0.05               |
| SE Greenland to SW Greenland   | 0.21       | 0.05               |
| Svalbard to Central Europe     | 0.14       | 0.04               |
| SE Greenland to Central Europe | -0.13      | 0.08               |
| N Greenland to SW Greenland    | 0.11       | 0.03               |
| N Greenland to SE Greenland    | -0.11      | 0.03               |
| SW Greenland to Fennoscandia   | -0.11      | 0.09               |
| N Greenland to Svalbard        | -0.04      | 0.02               |
| N Greenland to Fennoscandia    | 0.04       | 0.08               |
| Svalbard to SW Greenland       | -0.03      | 0.03               |
| Svalbard to Fennoscandia       | - 0.003    | 0.05               |

## References

- Björklund, J. A., Gunnarson, B. E., Krusic, P. J., Grudd, H., Josefsson, T., Östlund, L., and Linderholm, H. W.: Advances towards improved low-frequency tree-ring reconstructions, using an updated *Pinus sylvestris* L. MXD network from the Scandinavian Mountains, *Theoretical and Applied Climatology*, 113, 697–710, doi:10.1007/s00704-012-0787-7, 2013.
- 5 Büntgen, U., Frank, D. C., Nievergelt, D., and Esper, J.: Summer Temperature Variations in the European Alps, a.d. 755–2004, *Journal of Climate*, 19, 5606–5623, doi:10.1175/JCLI3917.1, 2006.
- Büntgen, U., Tegel, W., Nicolussi, K., McCormick, M., Frank, D., Trouet, V., Kaplan, J. O., Herzig, F., Heussner, K.-U., Wanner, H., Luterbacher, J., and Esper, J.: 2500 Years of European Climate Variability and Human Susceptibility, *Science*, 331, 578–582, doi:10.1126/science.1197175, 2011.
- 10 Büntgen, U., Frank, D., Neuenschwander, T., and Esper, J.: Fading temperature sensitivity of Alpine tree growth at its Mediterranean margin and associated effects on large-scale climate reconstructions, *Climatic Change*, 114, 651–666, doi:10.1007/s10584-012-0450-4, 2012.
- Büntgen, U., Kyncl, T., Ginzler, C., Jacks, D. S., Esper, J., Tegel, W., Heussner, K.-U., and Kyncl, J.: Filling the Eastern European gap in millennium-long temperature reconstructions, *Proceedings of the National Academy of Sciences*, 110, 1773–1778, doi:10.1073/pnas.1211485110, 2013.
- 15 Divine, D., Isaksson, E., Martma, T., Meijer, H. A., Moore, J., Pohjola, V., van de Wal, R. S. W., and Godtliebse, F.: Thousand years of winter surface air temperature variations in Svalbard and northern Norway reconstructed from ice-core data, *Polar Research*, 30, 7379, doi:10.3402/polar.v30i0.7379, 2011.
- Dobrovolný, P., Moberg, A., Brázdil, R., Pfister, C., Glaser, R., Wilson, R., Engelen, A. v., Limanówka, D., Kiss, A., Halíčková, M., Macková, J., Riemann, D., Luterbacher, J., and Böhm, R.: Monthly, seasonal and annual temperature reconstructions for Central Europe derived from documentary evidence and instrumental records since AD 1500, *Climatic Change*, 101, 69–107, doi:10.1007/s10584-009-9724-x, 2010.
- 20 Dorado Liñán, I., Büntgen, U., González-Rouco, F., Zorita, E., Montávez, J. P., Gómez-Navarro, J. J., Brunet, M., Heinrich, I., Helle, G., and Gutiérrez, E.: Estimating 750 years of temperature variations and uncertainties in the Pyrenees by tree-ring reconstructions and climate simulations, *Clim. Past*, 8, 919–933, doi:10.5194/cp-8-919-2012, 2012.
- Esper, J., Frank, D. C., Timonen, M., Zorita, E., Wilson, R. J. S., Luterbacher, J., Holzkämper, S., Fischer, N., Wagner, S., Nievergelt, D., 25 Verstege, A., and Büntgen, U.: Orbital forcing of tree-ring data, *Nature Climate Change*, 2, 862–866, doi:10.1038/nclimate1589, 2012.
- Fischer, H., Werner, M., Wagenbach, D., Schwager, M., Thorsteinsson, T., Wilhelms, F., Kipfstuhl, J., and Sommer, S.: Little Ice Age clearly recorded in northern Greenland ice cores, *Geophysical Research Letters*, 25, 1749–1752, doi:10.1029/98GL01177, 1998.
- Grootes, P. M. and Stuiver, M.: Oxygen 18/16 variability in Greenland snow and ice with  $10^{-3}$  - to  $10^5$  -year time resolution, *Journal of Geophysical Research: Oceans*, 102, 26 455–26 470, doi:10.1029/97JC00880, 1997.
- 30 Haltia-Hovi, E., Saarinen, T., and Kukkonen, M.: A 2000-year record of solar forcing on varved lake sediment in eastern Finland, *Quaternary Science Reviews*, 26, 678–689, doi:10.1016/j.quascirev.2006.11.005, 2007.
- Helama, S., Timonen, M., Holopainen, J., Ogurtsov, M. G., Mielikäinen, K., Eronen, M., Lindholm, M., and Meriläinen, J.: Summer temperature variations in Lapland during the Medieval Warm Period and the Little Ice Age relative to natural instability of thermohaline circulation on multi-decadal and multi-centennial scales, *Journal of Quaternary Science*, 24, 450–456, doi:10.1002/jqs.1291, 2009.
- 35 Isaksson, E., Divine, D., Kohler, J., Martma, T., Pohjola, V., Motoyama, H., and Watanabe, O.: Climate oscillations as recorded in svalbard ice core  $\omega 18\text{o}$  records between ad 1200 and 1997, *Geografiska Annaler: Series A, Physical Geography*, 87, 203–214, doi:10.1111/j.0435-3676.2005.00253.x, 2005.
- Kirchhefer, A. J.: Reconstruction of summer temperatures from tree-rings of Scots pine (*Pinus sylvestris* L.) in coastal northern Norway, *The Holocene*, 11, 41–52, doi:10.1191/095968301670181592, 2001.
- 40 Leijonhufvud, L., Wilson, R., Moberg, A., Söderberg, J., Retsö, D., and Söderlind, U.: Five centuries of Stockholm winter/spring temperatures reconstructed from documentary evidence and instrumental observations, *Climatic Change*, 101, 109–141, doi:10.1007/s10584-009-9650-y, 2010.
- McCarroll, D., Loader, N. J., Jalkanen, R., Gagen, M. H., Grudd, H., Gunnarson, B. E., Kirchhefer, A. J., Friedrich, M., Linderholm, H. W., Lindholm, M., Boettger, T., Los, S. O., Remmele, S., Kononov, Y. M., Yamazaki, Y. H., Young, G. H., and Zorita, E.: A 1200-year multiproxy record of tree growth and summer temperature at the northern pine forest limit of Europe, *The Holocene*, 23, 471–484, doi:10.1177/0959683612467483, 2013.
- 45 Melvin, T. M., Grudd, H., and Briffa, K. R.: Potential bias in ‘updating’ tree-ring chronologies using regional curve standardisation: Re-processing 1500 years of Torneträsk density and ring-width data, *The Holocene*, 23, 364–373, doi:10.1177/0959683612460791, 2013.
- Ojala, A. E. K. and Alenius, T.: 10 000 years of interannual sedimentation recorded in the Lake Nautajärvi (Finland) clastic–organic varves, *Palaeogeography, Palaeoclimatology, Palaeoecology*, 219, 285–302, doi:10.1016/j.palaeo.2005.01.002, 2005.
- 50 Ortega, P., Lehner, F., Swingedouw, D., Masson-Delmotte, V., Raible, C. C., Casado, M., and Yiou, P.: A model-tested North Atlantic Oscillation reconstruction for the past millennium, *Nature*, 523, 71–74, doi:10.1038/nature14518, 2015.

- Popa, I. and Kern, Z.: Long-term summer temperature reconstruction inferred from tree-ring records from the Eastern Carpathians, *Climate Dynamics*, 32, 1107–1117, doi:10.1007/s00382-008-0439-x, 2009.
- Saarni, S., Saarinen, T., and Lensu, A.: Organic lacustrine sediment varves as indicators of past precipitation changes: a 3,000-year climate record from Central Finland, *Journal of Paleolimnology*, 53, 401–413, doi:10.1007/s10933-015-9832-8, 2015.
- 5 Saarni, S., Saarinen, T., and Dulski, P.: Between the North Atlantic Oscillation and the Siberian High: A 4000-year snow accumulation history inferred from varved lake sediments in Finland, *The Holocene*, 26, 423–431, doi:10.1177/0959683615609747, 2016.
- Seim, A., Büntgen, U., Fonti, P., Haska, H., Herzig, F., Tegel, W., Trouet, V., and Treydte, K.: Climate sensitivity of a millennium-long pine chronology from Albania, *Climate Research*, 51, 217–228, doi:10.3354/cr01076, 2012.
- Tiljander, M., Saarnisto, M., Ojala, A. E. K., and Saarinen, T.: A 3000-year palaeoenvironmental record from annually laminated sediment of Lake Korttajärvi, central Finland, *Boreas*, 32, 566–577, doi:10.1111/j.1502-3885.2003.tb01236.x, 2003.
- 10 Vinther, B. M., Clausen, H. B., Johnsen, S. J., Rasmussen, S. O., Andersen, K. K., Buchardt, S. L., Dahl-Jensen, D., Seierstad, I. K., Siggaard-Andersen, M.-L., Steffensen, J. P., Svensson, A., Olsen, J., and Heinemeier, J.: A synchronized dating of three Greenland ice cores throughout the Holocene, *Journal of Geophysical Research: Atmospheres*, 111, D13 102, doi:10.1029/2005JD006921, 2006.
- Vinther, B. M., Clausen, H. B., Fisher, D. A., Koerner, R. M., Johnsen, S. J., Andersen, K. K., Dahl-Jensen, D., Rasmussen, S. O., Steffensen, J. P., and Svensson, A. M.: Synchronizing ice cores from the Renland and Agassiz ice caps to the Greenland Ice Core Chronology, *Journal of Geophysical Research: Atmospheres*, 113, D08 115, doi:10.1029/2007JD009143, 2008.
- 15 Vinther, B. M., Jones, P. D., Briffa, K. R., Clausen, H. B., Andersen, K. K., Dahl-Jensen, D., and Johnsen, S. J.: Climatic signals in multiple highly resolved stable isotope records from Greenland, *Quaternary Science Reviews*, 29, 522–538, doi:10.1016/j.quascirev.2009.11.002, 2010.
- 20 Wetter, O. and Pfister, C.: Spring-summer temperatures reconstructed for northern Switzerland and southwestern Germany from winter rye harvest dates, 1454–1970, *Clim. Past*, 7, 1307–1326, doi:10.5194/cp-7-1307-2011, 2011.
- Zhang, P., Linderholm, H. W., Gunnarson, B. E., Björklund, J., and Chen, D.: 1200 years of warm-season temperature variability in central Scandinavia inferred from tree-ring density, *Clim. Past*, 12, 1297–1312, doi:10.5194/cp-12-1297-2016, 2016.
